# Supplementary material for: Clinical implications of CD4+ T cell subsets in adult atopic asthma patients
Source: Springer Nature journal article supplement (doi:10.1186/s13223-018-0231-3), 2018-01-27
Supplement: MOESM2 [file 15504110]

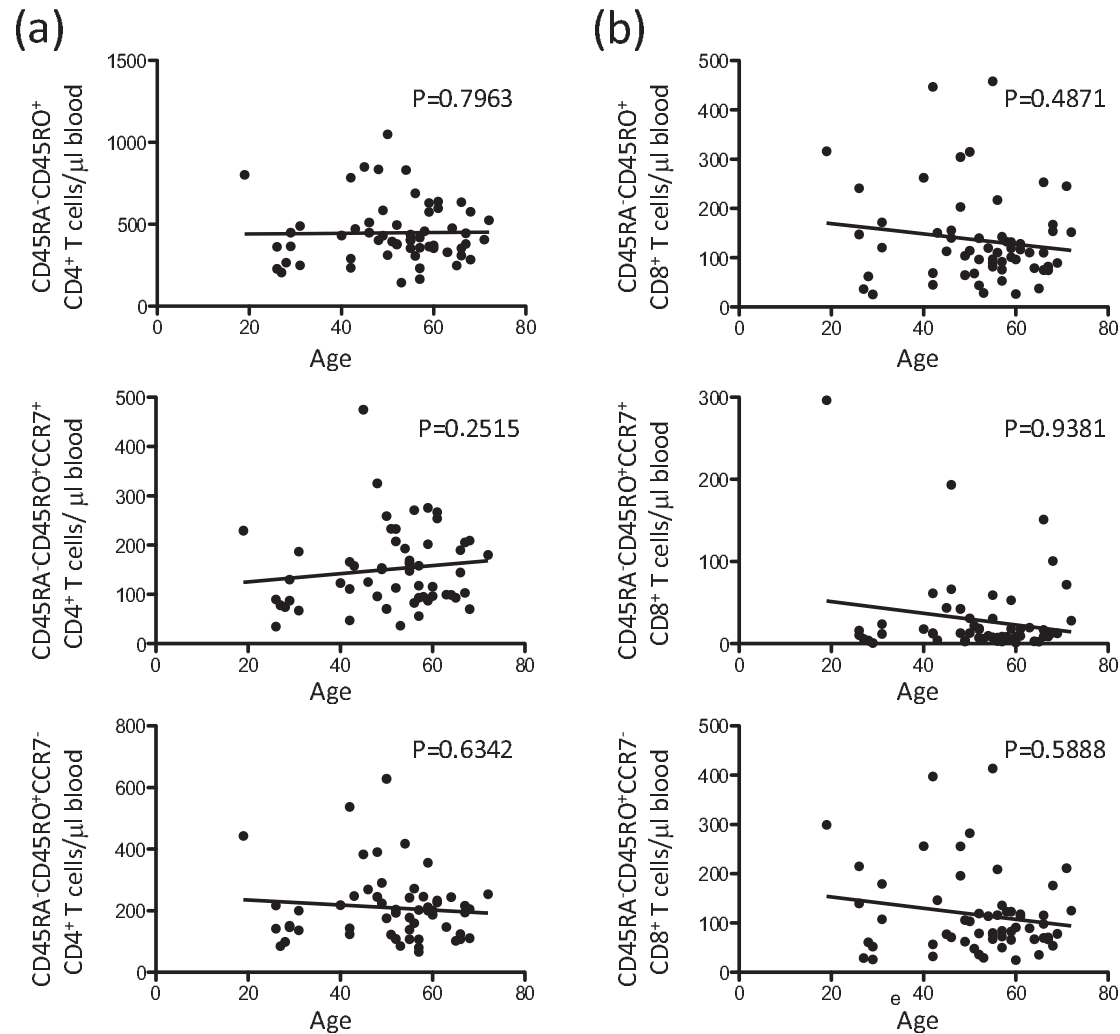

**Fig. S1** Correlation analysis of frequency of CD4<sup>+</sup> and CD8<sup>+</sup> memory T cells with age of recruited subjects. The numbers of CD45RA<sup>-</sup>CD45RO<sup>+</sup>, CD45RA<sup>-</sup>CD45RO<sup>+</sup>CCR7<sup>+</sup>, and CD45RA<sup>-</sup>CD45RO<sup>+</sup>CCR7<sup>-</sup> CD4<sup>+</sup> (a) and CD8<sup>+</sup> T cells (b) were enumerated per mL whole blood utilizing counting beads. Cell numbers were assessed for correlation with recruited subjects' age utilizing non-parametric Spearman correlation.
